# Supplementary material for: Real-World Treatment Patterns, Clinical Outcomes, and Healthcare Resource Utilization in Early-Stage Non-Small-Cell Lung Cancer
Source: MDPI journal article supplement (doi:10.3390/curroncol31010030), 2024-01-12
Supplement: s1 [file s1]

Table S1. Cancer-specific survival, log-rank tests, and crude hazard ratios for each subgroup analysis.

| Variable                           | Strata    | Median Survival <sup>1</sup><br>(95% CI) | 1-Year Survival<br>(95% CI) | 2-Year Survival<br>(95% CI) | 5-Year Survival<br>(95% CI) | Log-rank<br>Test<br>P-value | Crude Hazard<br>Ratio (95%<br>CI) |
|------------------------------------|-----------|------------------------------------------|-----------------------------|-----------------------------|-----------------------------|-----------------------------|-----------------------------------|
| Age                                | <65 years | 83.70 (70.78-NA)                         | 0.857 (0.838-0.877)         | 0.715 (0.689-0.742)         | 0.561 (0.530-0.594)         | <0.001                      | Ref (1.0)                         |
|                                    | ≥65 years | 31.96 (29.65-34.42)                      | 0.744 (0.730-0.759)         | 0.572 (0.556-0.589)         | 0.363 (0.345-0.383)         |                             | 1.74 (1.57-1.92)                  |
| Sex                                | Male      | 31.00 (27.68-34.59)                      | 0.746 (0.728-0.764)         | 0.564 (0.543-0.585)         | 0.378 (0.356-0.403)         | <0.001                      | Ref (1.0)                         |
|                                    | Female    | 45.50 (41.29-51.48)                      | 0.797 (0.782-0.813)         | 0.649 (0.630-0.668)         | 0.448 (0.425-0.471)         |                             | 0.81 (0.75-0.87)                  |
| Comorbidity                        | No        | 44.55 (40.34-52.70)                      | 0.821 (0.805-0.838)         | 0.646 (0.625-0.668)         | 0.451 (0.426-0.478)         | <0.001                      | Ref (1.0)                         |
|                                    | Yes       | 33.24 (30.81-36.49)                      | 0.737 (0.721-0.754)         | 0.581 (0.562-0.600)         | 0.388 (0.367-0.410)         |                             | 1.24 (1.14-1.34)                  |
| Stage                              | IB        | 89.23 (77.19-NA)                         | 0.900 (0.884-0.915)         | 0.797 (0.776-0.819)         | 0.577 (0.547-0.609)         | <0.001                      | Ref (1.0)                         |
|                                    | IIA       | 58.88 (44.65-74.93)                      | 0.831 (0.802-0.860)         | 0.685 (0.650-0.723)         | 0.497 (0.455-0.542)         |                             | 1.43 (1.24-1.64)                  |
|                                    | IIB       | 41.06 (33.80-57.60)                      | 0.788 (0.761-0.816)         | 0.628 (0.594-0.663)         | 0.443 (0.404-0.486)         |                             | 1.70 (1.49-1.93)                  |
|                                    | IIIA      | 18.84 (17.75-20.05)                      | 0.645 (0.623-0.667)         | 0.423 (0.400-0.447)         | 0.246 (0.224-0.270)         |                             | 2.98 (2.69-3.30)                  |
| Systemic<br>therapy                | No        | 34.59 (32.15-37.94)                      | 0.738 (0.724-0.752)         | 0.585 (0.569-0.602)         | 0.397 (0.378-0.416)         | <0.001                      | Ref (1.0)                         |
|                                    | Yes       | 48.76 (42.71-60.92)                      | 0.881 (0.863-0.900)         | 0.681 (0.654-0.710)         | 0.471 (0.438-0.505)         |                             | 0.74 (0.67-0.81)                  |
| Surgery                            | No        | 18.64 (17.49-19.60)                      | 0.642 (0.623-0.660)         | 0.418 (0.398-0.438)         | 0.197 (0.178-0.217)         | <0.001                      | Ref (1.0)                         |
|                                    | Yes       | 113.79 (113.00-NA)                       | 0.928 (0.917-0.939)         | 0.834 (0.818-0.850)         | 0.662 (0.639-0.685)         |                             | 0.24 (0.22-0.26)                  |
| Radiation<br>therapy               | No        | 55.33 (49.22-61.71)                      | 0.795 (0.781-0.809)         | 0.665 (0.648-0.682)         | 0.487 (0.467-0.508)         | <0.001                      | Ref (1.0)                         |
|                                    | Yes       | 24.13 (22.98-25.78)                      | 0.731 (0.710-0.753)         | 0.503 (0.479-0.529)         | 0.271 (0.245-0.299)         |                             | 1.65 (1.52-1.78)                  |
| Systemic<br>therapy in<br>stage IB | No        | 89.23 (77.19-NA)                         | 0.899 (0.883-0.915)         | 0.796 (0.775-0.818)         | 0.578 (0.547-0.611)         | 0.3                         | Ref (1.0)                         |
|                                    | Yes       | 61.12 (34.68-NA)                         | 0.926 (0.859-0.998)         | 0.823 (0.725-0.936)         | 0.545 (0.405-0.732)         |                             | 1.27 (0.84-1.94)                  |

|                                                   |                     |                     |                     |                     |                     |        |                          |
|---------------------------------------------------|---------------------|---------------------|---------------------|---------------------|---------------------|--------|--------------------------|
| <b>Systemic therapy in stage IIA</b>              | <b>No</b>           | 39.98 (34.29-50.60) | 0.776 (0.739-0.815) | 0.624 (0.581-0.671) | 0.431 (0.382-0.486) | <0.001 | Ref (1.0)                |
|                                                   | <b>Yes</b>          | 113.00 (89.33-NA)   | 0.967 (0.942-0.993) | 0.837 (0.784-0.893) | 0.655 (0.583-0.736) |        | 0.45 (0.34-0.60)         |
| <b>Systemic therapy in stage IIB</b>              | <b>No</b>           | 32.61 (27.16-39.12) | 0.745 (0.712-0.779) | 0.579 (0.540-0.621) | 0.380 (0.336-0.429) | <0.001 | Ref (1.0)                |
|                                                   | <b>Yes</b>          | NA (87.25-NA)       | 0.920 (0.883-0.958) | 0.779 (0.721-0.843) | 0.652 (0.579-0.734) |        | 0.43 (0.33-0.57)         |
| <b>Systemic therapy in stage IIIA</b>             | <b>No</b>           | 12.56 (11.44-13.84) | 0.514 (0.485-0.544) | 0.302 (0.275-0.331) | 0.161 (0.137-0.188) | <0.001 | Ref (1.0)                |
|                                                   | <b>Yes</b>          | 36.33 (32.12-41.46) | 0.845 (0.819-0.872) | 0.605 (0.570-0.643) | 0.375 (0.336-0.419) |        | 0.43 (0.38-0.48)         |
| <b>Surgery and systemic therapy</b>               | <b>Surgery only</b> | NA (113.29-NA)      | 0.922 (0.908-0.935) | 0.844 (0.826-0.863) | 0.684 (0.657-0.712) | 0.004  | Ref (1.0)                |
|                                                   | <b>Both</b>         | 102.90 (87.26-NA)   | 0.944 (0.926-0.962) | 0.807 (0.776-0.840) | 0.607 (0.564-0.653) |        | 1.27 (1.08-1.49)         |
| <b>Surgery and systemic therapy in stage IB</b>   | <b>Surgery only</b> | NA (113.29-NA)      | 0.969 (0.957-0.981) | 0.916 (0.897-0.936) | 0.766 (0.731-0.803) | 0.001  | Ref (1.0)                |
|                                                   | <b>Both</b>         | 61.12 (38.07-NA)    | 0.941 (0.865-1.000) | 0.873 (0.763-0.998) | 0.576 (0.408-0.813) |        | 2.40 (1.39-4.15)         |
| <b>Surgery and systemic therapy in stage IIA</b>  | <b>Surgery only</b> | 94.59 (80.48-NA)    | 0.909 (0.872-0.947) | 0.818 (0.768-0.871) | 0.685 (0.620-0.757) | 0.2    | Ref (1.0)                |
|                                                   | <b>Both</b>         | 113.00 (NA-NA)      | 0.975 (0.951-0.999) | 0.871 (0.819-0.925) | 0.709 (0.635-0.791) |        | 0.79 (95% CI: 0.54-1.14) |
| <b>Surgery and systemic therapy in stage IIB</b>  | <b>Surgery only</b> | 83.31 (70.78-NA)    | 0.908 (0.877-0.941) | 0.813 (0.768-0.860) | 0.610 (0.546-0.681) | 0.05   | Ref (1.0)                |
|                                                   | <b>Both</b>         | NA (NA-NA)          | 0.957 (0.926-0.989) | 0.832 (0.772-0.896) | 0.713 (0.635-0.801) |        | 0.69 (95% CI: 0.47-1.00) |
| <b>Surgery and systemic therapy in stage IIIA</b> | <b>Surgery only</b> | 43.04 (31.69-76.04) | 0.758 (0.701-0.820) | 0.619 (0.554-0.693) | 0.449 (0.377-0.534) | 0.03   | Ref (1.0)                |
|                                                   | <b>Both</b>         | 58.82 (43.69-92.22) | 0.918 (0.885-0.951) | 0.747 (0.695-0.803) | 0.500 (0.436-0.573) |        | 0.75 (95% CI: 0.58-0.97) |

Ref: reference group for the subgroup hazard ratio analysis; CI: confidence interval; NA: too few deaths to estimate confidence interval.

<sup>1</sup> Median survival in months.

Table S2. Mean healthcare resource utilization per patient per year, calculated from diagnosis, among eNSCLC patients with stage I or II disease.

| <b>Construct</b>                      | <b>Outcome</b>                                   | <b>Year 1<br/>(n=3185)</b> | <b>Year 2<br/>(n=2382)</b> | <b>Year 3<br/>(n=1750)</b> | <b>Year 4<br/>(n=1230)</b> | <b>Year 5<br/>(n=857)</b> |
|---------------------------------------|--------------------------------------------------|----------------------------|----------------------------|----------------------------|----------------------------|---------------------------|
| <b>Hospitalizations</b>               | <b>No. of Hospitalizations</b>                   | 1.43                       | 0.63                       | 0.5                        | 0.49                       | 0.47                      |
|                                       | <b>No. of Days Hospitalized</b>                  | 13.24                      | 7.46                       | 6.15                       | 5.12                       | 5.35                      |
| <b>Ambulatory Care Services</b>       | <b>No. of Encounters</b>                         | 12.34                      | 7.96                       | 7.08                       | 6.72                       | 6.2                       |
|                                       | <b>No. of Emergency Encounters</b>               | 1.8                        | 1.47                       | 1.37                       | 1.19                       | 1.27                      |
|                                       | <b>No. of Non-emergency Encounters</b>           | 10.53                      | 6.49                       | 5.72                       | 5.53                       | 4.93                      |
| <b>Cancer Physician Visits</b>        | <b>No. of Visits</b>                             | 3.05                       | 1.84                       | 1.64                       | 1.46                       | 1.26                      |
|                                       | <b>No. of Medical Oncologist Visits</b>          | 1.35                       | 0.94                       | 0.92                       | 0.81                       | 0.76                      |
|                                       | <b>No. of Radiation Oncologist Visits</b>        | 1.41                       | 0.71                       | 0.56                       | 0.52                       | 0.41                      |
|                                       | <b>No. of General/Family Practitioner Visits</b> | 0.08                       | 0.05                       | 0.06                       | 0.03                       | 0.02                      |
|                                       | <b>No. of Other Cancer Physician Visits</b>      | 0.21                       | 0.13                       | 0.1                        | 0.1                        | 0.07                      |
| <b>Non-cancer Practitioner Visits</b> | <b>No. of Encounters</b>                         | 34.33                      | 23.95                      | 21.81                      | 20.5                       | 21.22                     |
|                                       | <b>No. of Claims</b>                             | 70.19                      | 41.38                      | 37.38                      | 35.43                      | 36.66                     |
|                                       | <b>Final Claims Assessment Amount</b>            | 8502.06                    | 3494.62                    | 2964.74                    | 2767.04                    | 2859.98                   |
| <b>Radiation Therapy</b>              | <b>No. of Days of Therapy</b>                    | 4.51                       | 0.95                       | 0.81                       | 0.7                        | 0.7                       |

|                            |                      |      |      |      |      |      |
|----------------------------|----------------------|------|------|------|------|------|
| <b>Chemotherapy Cycles</b> | <b>No. of Cycles</b> | 0.96 | 0.49 | 0.49 | 0.47 | 0.47 |
|----------------------------|----------------------|------|------|------|------|------|

Table S3. Mean healthcare resource utilization per patient per year, calculated from diagnosis, among eNSCLC patients with stage IIIA disease.

| <b>Construct</b>                      | <b>Outcome</b>                                   | <b>Year 1<br/>(n=1941)</b> | <b>Year 2<br/>(n=1142)</b> | <b>Year 3<br/>(n=647)</b> | <b>Year 4<br/>(n=438)</b> | <b>Year 5<br/>(n=272)</b> |
|---------------------------------------|--------------------------------------------------|----------------------------|----------------------------|---------------------------|---------------------------|---------------------------|
| <b>Hospitalizations</b>               | <b>No. of Hospitalizations</b>                   | 1.31                       | 0.77                       | 0.54                      | 0.48                      | 0.41                      |
|                                       | <b>No. of Days Hospitalized</b>                  | 13.98                      | 9.94                       | 6.55                      | 5.64                      | 3.95                      |
| <b>Ambulatory Care Services</b>       | <b>No. of Encounters</b>                         | 11.17                      | 6.79                       | 6.49                      | 5.66                      | 6                         |
|                                       | <b>No. of Emergency Encounters</b>               | 2.28                       | 1.7                        | 1.31                      | 1.21                      | 1.1                       |
|                                       | <b>No. of Non-emergency Encounters</b>           | 8.89                       | 5.09                       | 5.18                      | 4.45                      | 4.9                       |
| <b>Cancer Physician Visits</b>        | <b>No. of Visits</b>                             | 7.35                       | 4.13                       | 3.65                      | 3.21                      | 3.19                      |
|                                       | <b>No. of Medical Oncologist Visits</b>          | 3.56                       | 2.65                       | 2.58                      | 2.28                      | 2.41                      |
|                                       | <b>No. of Radiation Oncologist Visits</b>        | 3.24                       | 1.11                       | 0.84                      | 0.74                      | 0.56                      |
|                                       | <b>No. of General/Family Practitioner Visits</b> | 0.22                       | 0.13                       | 0.05                      | 0.06                      | 0.06                      |
|                                       | <b>No. of Other Cancer Physician Visits</b>      | 0.32                       | 0.24                       | 0.17                      | 0.13                      | 0.17                      |
| <b>Non-cancer Practitioner Visits</b> | <b>No. of Encounters</b>                         | 32.46                      | 23.83                      | 20.56                     | 18.4                      | 19.42                     |
|                                       | <b>No. of Claims</b>                             | 64.7                       | 42.79                      | 35.87                     | 32.86                     | 33.4                      |

|                            |                                       |         |         |         |        |         |
|----------------------------|---------------------------------------|---------|---------|---------|--------|---------|
|                            | <b>Final Claims Assessment Amount</b> | 6623.45 | 3376.97 | 2793.49 | 2585.1 | 2770.37 |
| <b>Radiation Therapy</b>   | <b>No. of Days of Therapy</b>         | 13.65   | 1.68    | 1.21    | 0.99   | 0.39    |
| <b>Chemotherapy Cycles</b> | <b>No. of Cycles</b>                  | 2.98    | 1.39    | 1.23    | 1.22   | 1       |

Table S4. Mean healthcare resource utilization per patient per year, calculated from diagnosis, among eNSCLC patients who received systemic therapy.

| <b>Construct</b>                      | <b>Outcome</b>                                   | <b>Year 1<br/>(n=1210)</b> | <b>Year 2<br/>(n=986)</b> | <b>Year 3<br/>(n=674)</b> | <b>Year 4<br/>(n=470)</b> | <b>Year 5<br/>(n=318)</b> |
|---------------------------------------|--------------------------------------------------|----------------------------|---------------------------|---------------------------|---------------------------|---------------------------|
| <b>Hospitalizations</b>               | <b>No. of Hospitalizations</b>                   | 1.47                       | 0.67                      | 0.48                      | 0.4                       | 0.36                      |
|                                       | <b>No. of Days Hospitalized</b>                  | 11.16                      | 7.5                       | 5.63                      | 4.19                      | 3.75                      |
| <b>Ambulatory Care Services</b>       | <b>No. of Encounters</b>                         | 13.29                      | 7.5                       | 6.45                      | 5.54                      | 5.22                      |
|                                       | <b>No. of Emergency Encounters</b>               | 2.33                       | 1.61                      | 1.21                      | 0.94                      | 0.88                      |
|                                       | <b>No. of Non-emergency Encounters</b>           | 10.96                      | 5.88                      | 5.24                      | 4.6                       | 4.34                      |
| <b>Cancer Physician Visits</b>        | <b>No. of Visits</b>                             | 12.06                      | 4.93                      | 3.84                      | 3.31                      | 2.82                      |
|                                       | <b>No. of Medical Oncologist Visits</b>          | 7.4                        | 3.42                      | 2.88                      | 2.39                      | 2.13                      |
|                                       | <b>No. of Radiation Oncologist Visits</b>        | 3.74                       | 1.07                      | 0.77                      | 0.72                      | 0.55                      |
|                                       | <b>No. of General/Family Practitioner Visits</b> | 0.39                       | 0.16                      | 0.05                      | 0.06                      | 0.04                      |
|                                       | <b>No. of Other Cancer Physician Visits</b>      | 0.52                       | 0.28                      | 0.13                      | 0.14                      | 0.1                       |
| <b>Non-cancer Practitioner Visits</b> | <b>No. of Encounters</b>                         | 31.49                      | 21.98                     | 19.32                     | 17.5                      | 18.87                     |

|                            |                                       |         |         |         |         |         |
|----------------------------|---------------------------------------|---------|---------|---------|---------|---------|
|                            | <b>No. of Claims</b>                  | 65.68   | 39.82   | 33.69   | 30.61   | 32.43   |
|                            | <b>Final Claims Assessment Amount</b> | 8162.62 | 3340.85 | 2692.73 | 2403.21 | 2578.78 |
| <b>Radiation Therapy</b>   | <b>No. of Days of Therapy</b>         | 18.63   | 1.73    | 1.23    | 1.19    | 0.55    |
| <b>Chemotherapy Cycles</b> | <b>No. of Cycles</b>                  | 7.2     | 1.81    | 1.37    | 1.37    | 0.97    |

Table S5. Mean healthcare resource utilization per patient per year, calculated from diagnosis, among eNSCLC patients who did not receive systemic therapy.

| <b>Construct</b>                | <b>Outcome</b>                                   | <b>Year 1<br/>(n=3916)</b> | <b>Year 2<br/>(n=2538)</b> | <b>Year 3<br/>(n=1723)</b> | <b>Year 4<br/>(n=1198)</b> | <b>Year 5<br/>(n=811)</b> |
|---------------------------------|--------------------------------------------------|----------------------------|----------------------------|----------------------------|----------------------------|---------------------------|
| <b>Hospitalizations</b>         | <b>No. of Hospitalizations</b>                   | 1.36                       | 0.68                       | 0.52                       | 0.53                       | 0.5                       |
|                                 | <b>No. of Days Hospitalized</b>                  | 14.25                      | 8.56                       | 6.5                        | 5.67                       | 5.51                      |
| <b>Ambulatory Care Services</b> | <b>No. of Encounters</b>                         | 11.46                      | 7.61                       | 7.11                       | 6.8                        | 6.52                      |
|                                 | <b>No. of Emergency Encounters</b>               | 1.87                       | 1.52                       | 1.41                       | 1.3                        | 1.36                      |
|                                 | <b>No. of Non-emergency Encounters</b>           | 9.59                       | 6.1                        | 5.7                        | 5.5                        | 5.15                      |
| <b>Cancer Physician Visits</b>  | <b>No. of Visits</b>                             | 2.4                        | 1.67                       | 1.53                       | 1.38                       | 1.3                       |
|                                 | <b>No. of Medical Oncologist Visits</b>          | 0.58                       | 0.75                       | 0.78                       | 0.73                       | 0.77                      |
|                                 | <b>No. of Radiation Oncologist Visits</b>        | 1.59                       | 0.75                       | 0.58                       | 0.52                       | 0.41                      |
|                                 | <b>No. of General/Family Practitioner Visits</b> | 0.06                       | 0.05                       | 0.06                       | 0.03                       | 0.02                      |

|                                               |                                                     |         |         |         |         |         |
|-----------------------------------------------|-----------------------------------------------------|---------|---------|---------|---------|---------|
|                                               | <b>No. of Other<br/>Cancer<br/>Physician Visits</b> | 0.17    | 0.12    | 0.11    | 0.1     | 0.09    |
| <b>Non-cancer<br/>Practitioner<br/>Visits</b> | <b>No. of<br/>Encounters</b>                        | 34.28   | 24.66   | 22.32   | 20.91   | 21.54   |
|                                               | <b>No. of Claims</b>                                | 68.86   | 42.62   | 38.26   | 36.38   | 37.22   |
|                                               | <b>Final Claims<br/>Assessment<br/>Amount</b>       | 7675.79 | 3501.43 | 3006.84 | 2843.26 | 2940.19 |
| <b>Radiation<br/>Therapy</b>                  | <b>No. of Days of<br/>Therapy</b>                   | 4.67    | 0.97    | 0.79    | 0.62    | 0.65    |
| <b>Chemotherapy<br/>Cycles</b>                | <b>No. of Cycles</b>                                | 0.03    | 0.38    | 0.43    | 0.4     | 0.45    |
